# Supplementary material for: Lipoprotein Processing and Sorting in Helicobacter pylori
Source: PubMed Central journal article supplement (PMC7240156; doi:10.1128/mbio.00911-20), 2020-05-19
Supplement: mBio.00911-20-sf001.pdf [file mBio.00911-20-sf001.pdf]

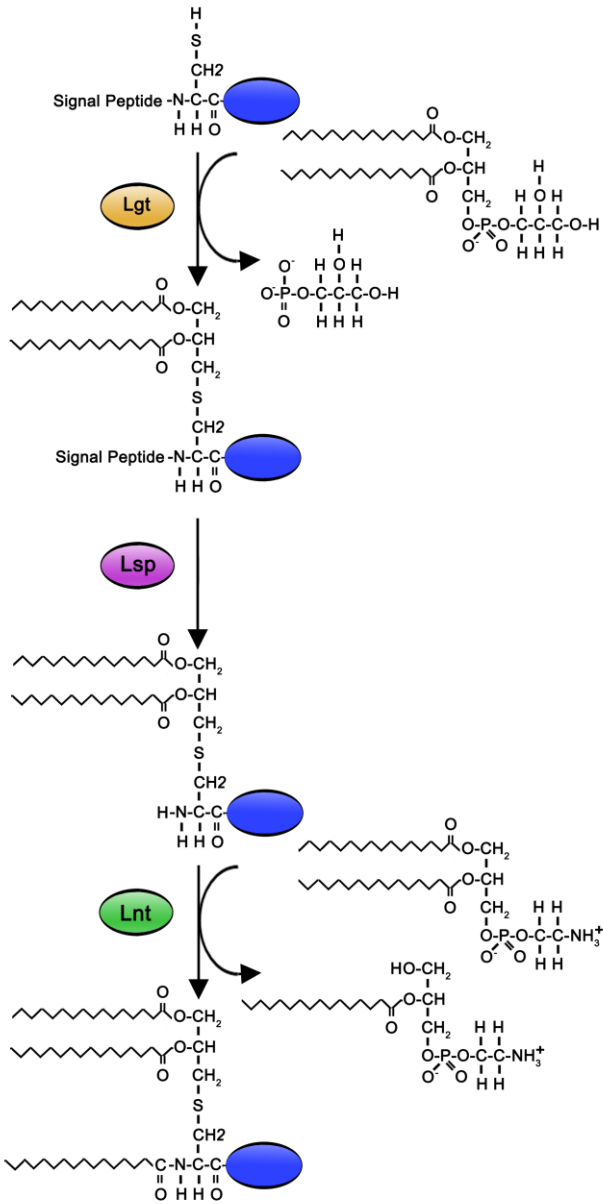

**Supplemental Figure S1: Post-translational modifications in synthesis of lipoproteins in Gram-negative bacteria.** The first modification is the addition of a diacylglyceride to the cysteine sulfhydryl of the prelipoprotein, catalyzed by lipoprotein diacylglyceryl transferase (Lgt). Amino acids preceding the cysteine are cleaved by lipoprotein signal peptidase (Lsp), resulting in a diacylated apolipoprotein.

Finally, a fatty acid is ligated to the amino terminus of the amino-terminal cysteine by apolipoprotein N-acyltransferase (Lnt) to produce the mature triacylated lipoprotein.
